# Supplementary material for: The Spectrum of Clinical and Serological Features of COVID-19 in Urban Hemodialysis Patients
Source: PubMed Central journal article supplement (PMC7408812; doi:10.3390/jcm9072264), 2020-07-16
Supplement: jcm-09-02264-s001.pdf [file jcm-09-02264-s001.pdf]

## Supplementary Materials

**Table S1.** Characteristics of polymerase chain reaction (PCR) negative patients, according to diagnosis of COVID-19. Only symptoms presented by at least 1 patient are represented. Data presented as mean±SD, median (interquartile range) or counts (percentage).

| Characteristics                 | Positive Serology<br>(n = 8) |              | Negative Serology, Clinical Diagnosis<br>(n = 2) |               | No COVID-19<br>(n = 18) |              |
|---------------------------------|------------------------------|--------------|--------------------------------------------------|---------------|-------------------------|--------------|
| Age, years                      | 69.125                       | ± 17.1       | 71                                               | ±7.07         | 63.3                    | ±13.41       |
| Dialysis center, n (%)          |                              |              |                                                  |               |                         |              |
| FJD                             | 7                            | (87.5)       | 2                                                | (100)         | 18                      | (100)        |
| FRCSE                           | 1                            | (12.5)       | 0                                                |               | 0                       |              |
| Dialysis vintage, days          | 1027.2                       | ±876.1       | 938.5                                            |               | 610.8                   | ±775.5       |
| Female, n (%)                   | 4                            | (50)         | 0                                                |               | 4                       | (22)         |
| Hospital admission, n (%)       | 1                            | (12.5)       | 2                                                | (100)         | 3                       | (16.7)       |
| Symptoms, n (%)                 |                              |              |                                                  |               |                         |              |
| Asymptomatic                    | 6                            | (75)         | 0                                                |               | 14                      | (77.8)       |
| Dyspnea                         | 0                            |              | 0                                                |               | 1                       | (5.6)        |
| Abdominal pain                  | 0                            |              | 0                                                |               | 1                       | (5.6)        |
| Fever                           | 1                            | (12.5)       | 2                                                | (100)         | 2                       | (11.1)       |
| General malaise                 | 1                            | (12.5)       | 0                                                |               | 0                       |              |
| Oxygen saturation, %            | 95%                          | *            | 96                                               | *             | 96.3                    | ±4.99        |
| Chest X-ray, n (%)              |                              |              |                                                  |               |                         |              |
| Normal                          | 1                            | (12.5)       | 0                                                |               | 5                       | (27.8)       |
| Unilateral pneumonia            | 0                            |              | 1                                                | (50)          | 1                       | (5.6)        |
| Bilateral pneumonia             | 1                            | (12.5)       | 1                                                | (50)          | 1                       | (5.6)        |
| No                              | 6                            | (75)         | 0                                                |               | 11                      | (61.1)       |
| Clinical analysis               |                              |              |                                                  |               |                         |              |
| Hemoglobin, g/dL                | 11.2                         | ±1.46        | 11.95                                            | ±2.47         | 11.2                    | ±1.92        |
| Lymphocytes <sup>n</sup> ,/μL   | 1150                         | (900-1400)   | 400                                              | (400-400)     | 1000                    | (850-1425)   |
| D dimer <sup>n</sup> , μg/L     | 1148.5                       | (701-1562)   | 2812                                             | (2382-3242)   | 1162                    | (739-2160)   |
| Ferritin, ng/mL                 | 513                          | (204-1067)   | 482                                              | (291-673)     | 423                     | (340-598)    |
| Troponin I <sup>n</sup> , ng/mL | 0.04                         | (0.007-0.06) | 0.006                                            | (0.003-0.008) | 0.05                    | (0.021-0.07) |
| IL6 <sup>n</sup> , pg/mL        | 8.94                         | (3.27-18.26) | 31.2                                             | (25.95-36.45) | 10.34                   | (7.45-15.07) |
| Serology, n (%)                 |                              |              |                                                  |               |                         |              |
| IgM, n (%)                      |                              |              |                                                  |               |                         |              |
| Positive                        | 8                            | (100)        | 0                                                |               |                         |              |
| Negative                        | 0                            |              | 2                                                | (100)         | 18                      | (100)        |
| IgG, n (%)                      |                              |              |                                                  |               |                         |              |
| Positive                        | 4                            | (50)         | 0                                                |               |                         |              |
| Negative                        | 4                            | (50)         | 2                                                | (100)         | 18                      | (100)        |
| IgG + IgM positive, n (%)       | 4                            | (50)         | 0                                                |               | 0                       |              |

\* data for n = 2. <sup>n</sup> Normal range: Lymphocytes 1200 – 5000/ μl; D-dimer 68–494 μg/l, Troponin I < 0.08 ng/mL, IL6 < 7 pg/mL.

**Table S2.** Characteristics of patients with positive and negative PCR. Data presented as mean±SD, median (interquartile range) or counts (percentage).

| Characteristics                       | Positive PCR |        | Negative PCR |       | P value |
|---------------------------------------|--------------|--------|--------------|-------|---------|
|                                       | (N = 38)     |        | (N = 10)     |       |         |
| Initial dialysis center, <i>n</i> (%) |              |        |              |       |         |
| FJD                                   | 13           | (34.2) | 10           | (100) |         |
| FRCSE                                 | 25           | (65.8) | 0            |       |         |
| Symptoms, <i>n</i> (%)                |              |        |              |       |         |
| Asymptomatic                          | 5            | (13.2) | 6            | (60)  | 0.001   |
| Asthenia                              | 1            | (2.6)  | 0            |       |         |
| Diarrhea                              | 4            | (10.5) | 0            |       |         |
| Dyspnea                               | 4            | (10.5) | 0            |       |         |
| Abdominal pain                        | 1            | (2.6)  | 0            |       |         |
| Fever                                 | 12           | (31.5) | 3            | (30)  |         |
| Cough                                 | 4            | (10.5) | 0            |       |         |
| Chest pain                            | 1            | (2.6)  | 0            |       |         |
| General malaise                       | 4            | (10.5) | 1            | (10)  |         |
| Nausea                                | 1            | (2.6)  | 0            |       |         |
| Other manifestations                  |              |        |              |       |         |
| AV blockade                           | 1            | (2.6)  | 0            |       |         |

**Table S3.** Analysis of PCR positive patients, according to hospitalization related to disease severity. Data presented as mean  $\pm$  SD, median (interquartile range) or counts (percentage).

| Characteristics                       | Hospitalization |              | P value |
|---------------------------------------|-----------------|--------------|---------|
|                                       | No (N = 17)     | Yes (N = 21) |         |
| Initial dialysis center, <i>n</i> (%) |                 |              |         |
| FJD                                   | 6 (37.5)        | 7 (31.2)     |         |
| FRCSE                                 | 10 (62.5)       | 15 (68.2)    |         |
| Symptoms, <i>n</i> (%)                |                 |              | ns      |
| Asymptomatic                          | 5 (31.25)       | 0            |         |
| Asthenia                              | 1 (6.25)        | 0            |         |
| Diarrhea                              | 2 (12.5)        | 2 (9.1)      |         |
| Dyspnea                               | 2 (12.5)        | 2 (9.1)      |         |
| Abdominal pain                        | 1 (6.25)        | 0            |         |
| Fever                                 | 4 (25)          | 8 (36.3)     |         |
| Cough                                 | 1 (6.25)        | 3 (13.6)     |         |
| Chest pain                            | 0               | 1 (4.5)      |         |
| General malaise                       | 0               | 4 (18.2)     |         |
| Nausea                                | 0               | 1 (4.5)      |         |
| Other manifestations                  |                 |              |         |
| AV blockade                           | 0               | 1 (4.5)      |         |

**Table S4.** Analysis of PCR negative patients, according to hospitalization related to disease severity. Data presented as mean  $\pm$  SD, median (interquartile range) or counts (percentage).

| Characteristics                       | Hospitalization |             | P value |
|---------------------------------------|-----------------|-------------|---------|
|                                       | No (N = 7)      | Yes (N = 3) |         |
| Initial dialysis center, <i>n</i> (%) |                 |             |         |
| FJD                                   | 7 (100)         | 2 (66.7)    |         |
| FRCSE                                 | 0               | 1 (33.3)    |         |
| Symptoms, <i>n</i> (%)                | 1 (14.3)        | 3 (100)     |         |
| Asymptomatic                          | 6 (85.7)        | 0           |         |
| Asthenia                              | 0               | 0           |         |
| Diarrhea                              | 0               | 0 (80)      |         |
| Dyspnea                               | 0               | 0           |         |
| Abdominal pain                        | 0               | 0           |         |
| Fever                                 | 1 (14.7)        | 2 (66.7)    |         |
| Cough                                 | 0               | 0           |         |
| Nausea                                | 0               | 0           |         |

**Table S5.** COVID-19 hemodialysis cohorts.

| Series<br>(Reference) | Total<br>patients in<br>unit | Total<br>patients<br>tested <i>n</i> (%) | Testing criteria                                   | PCR+<br><i>n</i> (%) *** | Clinical or<br>serological<br>diagnosis <i>n</i> (%)*** | COVID-19                 |                              |                     |                    |                |                   |
|-----------------------|------------------------------|------------------------------------------|----------------------------------------------------|--------------------------|---------------------------------------------------------|--------------------------|------------------------------|---------------------|--------------------|----------------|-------------------|
|                       |                              |                                          |                                                    |                          |                                                         | Overall<br>incidence**** | Asymptomatic<br><i>n</i> (%) | Mortality<br>(PCR+) | Mortality<br>(all) | Age<br>(all)   | Age<br>(deceased) |
| Spain (A+B)           | 290                          | 156 (54%)                                | Symptomatic first,<br>close contacts,<br>screening | 74/156<br>(47%)          | 11/156 (7%)                                             | 85/290 (29%)             | 26/75 (35%)                  | 11/75 (15%)         | 11/85<br>(13%)-    | -              | -                 |
| A <sup>36</sup>       | 90                           | 90 (100%)                                | Screening                                          | 36/90<br>(40%)           | 1/90 (1%)                                               | 37/90 (41%)              | 15/37 (40%)                  | 6/36 (17%)          | 6/37 (16%)         | ND             | 80±15             |
| B (Present<br>work)   | 200                          | 66 (33%)                                 | Symptomatic, close<br>contacts. Screening*         | 38/66<br>(58%)           | 10/66 (15.2%)                                           | 48/200 (24%)             | 11/38 (29%)                  | 5/38 (13%)          | 5/48 (10%)         | 73±13          | 79±4              |
| Italy (C+D)           | 657                          | ND                                       | ND                                                 | 62/657<br>(9%)           | ND                                                      | 62/657 (9%)              | ND                           | 23/62 (37%)         | 23/62<br>(37%)     | -              | ND                |
| C <sup>37</sup>       | 400                          | ND                                       | ND                                                 | 21/400<br>(5%)           | ND                                                      | 21/400 (5%)              | ND                           | 5/21 (24%)          | 5/21 (24%)         | ND             | ND                |
| D <sup>38</sup>       | 257                          | ND                                       | ND                                                 | 41/257<br>(16%)          | ND                                                      | 41/257 (16%)             | ND                           | 18/41 (41%)         | 18/41<br>(41%)     | 73±11          | ND                |
| China (E+F)           | 857                          | 857 (100%)                               | Screening                                          | 103(12%)                 | ND                                                      | 103 (12%)                | 50/103 (48%)                 | 18/103<br>(17%)     | 18/103<br>(17%)    | -              | -                 |
| E <sup>17</sup>       | 230                          | 230 (100%)                               | Screening                                          | 37 (16%)                 | ND                                                      | 37 (16%)                 | 27/37 (72%)                  | 6/37 (16%)          | 6/37 (16%)         | 66 (55-<br>81) | ND                |
| F <sup>30</sup>       | 627                          | 627 (100%)                               | Screening                                          | 66 (10%)                 | ND                                                      | 66 (10%)                 | 23/66 (26%)                  | 12/66 (18%)         | 12/66<br>(18%)     | 61±13          | ND                |

ND: no data. \* Screening for remaining no tested patients in the unit receiving all COVID-19 patients from two coordinated dialysis units. \*\* same as for PCR+ patients. \*\*\* out of tested patients. \*\*\*\* out of the whole dialysis unit/s.
